# Supplementary material for: The Current Developments in Medicinal Plant Genomics Enabled the Diversification of Secondary Metabolites’ Biosynthesis
Source: MDPI journal article supplement (doi:10.3390/ijms232415932), 2022-12-14
Supplement: s1 [file s1]

**Supplementary Table S1.** Plant genomics completed by Sanger sequencing technology.

| Species                      | Genome size (Mb) | Coverage | References |
|------------------------------|------------------|----------|------------|
| <i>G. max</i>                | 1100             | 8.0X     | [173]      |
| <i>B. distachyon</i>         | 272              | 9.4X     | [174]      |
| <i>R. communis</i>           | 320              | 4.6X     | [175]      |
| <i>Zea mays</i>              | 2300             | 6.0X     | [176]      |
| <i>Sorgum bicolor</i>        | 730              | 8.5X     | [177]      |
| <i>Physcomitrella patens</i> | 511              | 9.0X     | [178]      |
| <i>Carica papaya</i>         | 372              | 3.0X     | [179]      |
| <i>Vitis vinifera</i>        | 487              | 8.4X     | [180]      |
| <i>Populus trichocarpa</i>   | 485              | 7.5X     | [181]      |
| <i>Oryza sativa indica</i>   | 466              | 4.0X     | [182]      |
| <i>O. sativa japonica</i>    | 420              | 6.0X     | [183]      |
| <i>A. thaliana</i>           | 125              | -        | [184]      |

Supplementary Table S2. Plant genomics completed by second-generation sequencing technology.

| Species                        | Genome size (Mb) | Genome Coverage | Scaffolds | Contigs | N50     | Sequence method       | Assembly method                                                                 | References |
|--------------------------------|------------------|-----------------|-----------|---------|---------|-----------------------|---------------------------------------------------------------------------------|------------|
| <i>Asclepias syriaca</i>       | 236.77 Mb        | 80.4x           | 221855    | 268318  | 1505    | Illumina              | Platanus v. 1.2.1; SCUBAT v. 2015-12-17                                         | [185]      |
| <i>Panax ginseng</i>           | 2980             | 307x            | 9845      | 240888  | 22539   | Illumina              | SOAPdenovo2                                                                     | [186]      |
| <i>Chrysanthemum seticuspe</i> | 2721.84          | 96x             | 354212    | 961201  | 7793    | Illumina              | SOAPdenovo v. 2.0.4; SSPACE v. 2.0; GapCloser v. 1.10; GapFiller v1-10          | [187]      |
| <i>Megacarpaea delavayi</i>    | 883.81           | 150x            |           | 763815  | 65480   | Illumina              | Platanus v1.2.4                                                                 | [188]      |
| <i>Sinapis alba</i>            | 449.668          | 96x             | 12410     | 30825   | 98426   | Illumina              | discoverDeNovo v. 51464                                                         | [189]      |
| <i>Mesua ferrea</i>            | 614.35           | 180x            | 503130    | 587971  | 55831   | Illumina              | MaSuRCA version 3.3.1                                                           | [190]      |
| <i>Platycodon grandiflorus</i> | 680.178          | 480.2x          | 4816      | 75346   | 58279   | Illumina HiSeq        | SOAPdenovo2 v. 2.04; Celera Assembler v. 8.1; GARM v. 0.7.5; CAP3 v. 02-10-2015 | [51]       |
| <i>Benincasa hispida</i>       | 912.95           | 50.0x           | 1791      | 14936   | 144985  | Illumina              | AllPaths v. ALLPATHS-LG-44837                                                   | [191]      |
| <i>Dioscorea rotundata</i>     | 456.675          | 100x            | 21        | 34429   | 22084   | Illumina HiSeq 2500   | Allpaths-LG v. r49856, SSPACE Premium v. 2.3                                    | [192]      |
| <i>Vernicia fordii</i>         | 1,176.32         | 100x            | 20614     |         |         | Illumina Hiseq        | SOAPdenovo2 r240, SSPACE v1.2                                                   | [58]       |
| <i>Lablab purpureus</i>        |                  | 194x            | 118976    | 135039  | 32223   | Illumina HiSeq        | SOAPdenovo v. 2-2.04                                                            | [193]      |
| <i>Mimosa pudica</i>           | 557.202          | 413x            | 97892     | 119356  | 27447   | Illumina HiSeq        | Platanus v. 1                                                                   | [194]      |
| <i>Gnetum montanum</i>         | 4070             | 302x            | 142000    | 475170  | 25019   | Illumina HiSeq        | SOAPdenovo                                                                      | [195]      |
| <i>Hydrangea macrophylla</i>   | 2178             | 108x            | 3779      | 15791   | 1400000 | Illumina              | Platanus, FALCON v.1.8.8                                                        | [196]      |
| <i>Pterocarya stenoptera</i>   | 955.601          | 300x            | 124315    | 211800  | 37442   | Illumina              | MaSuRCA v. 2.3.3; SOAPdenovo2 v. 2.04                                           | [197]      |
| <i>Lavandula angustifolia</i>  | 870              | 100x            | 84291     |         |         | Illumina HiSeq        | FERMI, OPERA, GapCloser                                                         | [198]      |
| <i>Ocimum basilicum</i>        | 2067.62          | 65x             | 17105     |         | 48300   | Illumina NovaSeq 6000 | Supernova v2.1.1                                                                | [199]      |
| <i>Origanum majorana</i>       | 760.89           | 65x             | 8763      |         | 35950   | Illumina NovaSeq 6000 | Supernova v2.1.1                                                                | [199]      |
| <i>Origanum vulgare</i>        | 630.04           | 65x             | 13832     |         | 26280   | Illumina NovaSeq 6000 | Supernova v2.1.1                                                                | [199]      |
| <i>Pogostemon cablin</i>       | 1916.69          | 355x            | 41698     |         | 202492  | Illumina HiSeq        | SOAPdenovo v. 2.04                                                              | [200]      |
| <i>Rosmarinus officinalis</i>  | 1013.85          | 65x             | 23035     |         | 21820   | Illumina NovaSeq 6000 | Supernova v2.1.1                                                                | [199]      |
| <i>Moringa oleifera</i>        |                  | 398x            | 22329     | 29972   | 45268   | Illumina HiSeq        | SOAPdenovo v. 2-2.04                                                            | [193]      |

|                             |         |        |          |          |         |                     |                                         |       |
|-----------------------------|---------|--------|----------|----------|---------|---------------------|-----------------------------------------|-------|
| <i>Nelumbo nucifera</i>     | 817.268 | 100x   | 2341     | 53811    | 44440   | Illumina HiSeq, 454 | AllPaths v. 40102; ALLMAPS v. June-2017 | [201] |
| <i>Osmanthus fragrans</i>   | 733.5   | 100x   |          | 145      | 1595720 | Illumina HiSeq      | Falcon v0.3.0, Arrow                    | [202] |
| <i>Gastrodia elata</i>      | 1060.98 | 150x   | 3768     | 35404    | 97233   | Illumina            | AllPaths v. 44080                       | [203] |
| <i>Phytolacca americana</i> | 933     | 83x    | 847766   |          | 35208   | Illumina            | Discover De Novo                        | [204] |
| <i>Abies alba</i>           | 18167   | 152x   | 37192295 | 45280944 | 2477    | Illumina            | SOAPdenovo, BESSTv2.2.5                 | [205] |
| <i>Cydonia oblonga</i>      | 488.422 | 108x   |          | 303932   | 2435    | Illumina            | SOAPdenovo v. 2                         | [206] |
| <i>Chiococca alba</i>       | 558     | 301x   | 3518     | 15168    | 60292   | Illumina            | ALLPATHS-LG                             | [54]  |
| <i>Citrus reticulata</i>    | 344.273 | 200x   | 67725    | 77693    | 97052   | Illumina HiSeq      | Platanus v. 1.2.4                       | [207] |
| <i>Santalum album</i>       | 220.961 | 90x    | 12821    | 29203    | 25151   | Illumina HiSeq      | SPAdes v. 3.6.1                         | [208] |
| <i>Aquilaria sinensis</i>   | 783.887 | 55.67x | 14276    | 47303    | 60210   | Illumina HiSeq      | HiRise v. May-2019                      | [209] |
| <i>Boehmeria nivea</i>      | 344.617 | 256x   | 12775    | 32476    | 24523   | Illumina HiSeq      | Platanus v. 2.23                        | [210] |
| <i>Polygonum cuspidatum</i> | 2565    | 147x   | 948118   | 1078298  | 2769    | Illumina HiSeq      | SOAPdenovo                              | [211] |
| <i>Dracaena cambodiana</i>  | 1064.43 | 89x    | 2379659  | 2640704  | 1859    | Illumina HiSeq 2500 | SOAPdenovo                              | [212] |
| <i>Alnus glutinosa</i>      | 611.874 | 326x   | 167345   | 211045   | 9564    | Illumina HiSeq      | Platanus v. 1                           | [194] |

**Supplementary Table S3.** Medicinal plant genome completed by third-generation sequencing.

| Species                           | Genome size (MB) | Genome Coverage | Scaffolds | Contigs | N50      | Sequence method                               | Assembly method                                    | References |
|-----------------------------------|------------------|-----------------|-----------|---------|----------|-----------------------------------------------|----------------------------------------------------|------------|
| <i>Andrographis paniculata</i>    | 269.408 Mb       | 100.0x          | 257       | 1278    | 388864   | PacBio RSII                                   | CANU v. 1.5                                        | [59]       |
| <i>Strobilanthes Cusia</i>        | 865.49 Mb        | 130x            |           | 1602    | 4329179  | Illumina Hiseq, Oxford Nanopore, Hi-C         | Caun, Falcon, WTDGB                                | [52]       |
| <i>Atriplex hortensis</i>         | 964              | 68x             |           | 3183    | 1114696  | Illumina, Nanopore                            | Canu v.1.7.1                                       | [213]      |
| <i>Allium sativum</i>             | 16559.4          | 188x            | 18350     | 121677  | 193988   | PacBio Sequel                                 | FALCON v. 1.0                                      | [49]       |
| <i>Mangifera indica</i>           | 392.98           | 240x            | 252       | 421     | 3579047  | Illumina, PacBio                              | Canu v.1.8                                         | [214]      |
| <i>Pistacia vera</i>              | 671.28           | 374x            | 1865      | 2327    | 714252   | Illumina, PacBio                              | PBJelly v. 15.8.24                                 | [215]      |
| <i>Annona muricata</i>            | 656.77           | 676x            | 949       | 2066    | 784561   | Illumina, PacBio                              | SOAPdenovo2                                        | [216]      |
| <i>Apium graveolens</i>           | 3,332.57         | 232.22X         | 4,863     | 9,496   | 790578   | PacBio Sequel I, Illumina HiSeq, 10X Genomics | FALCON, Quiver                                     | [217]      |
| <i>Coriandrum sativum</i>         | 2118.68          | 271x            | 6186      | 9936    | 604128   | PacBio, Illumina                              |                                                    | [218]      |
| <i>Panax notoginseng</i>          | 2359.97          | 110x            | 179913    | 616542  | 16420    | PacBio, Illumina                              | SOAPdenovo(v2.04)                                  |            |
| <i>Asparagus setaceus</i>         | 710.152          | 156.0x          | 665       | 1,879   | 1367059  | Oxford Nanopore GridION                       | Canu v. 1.8                                        | [219]      |
| <i>Aloe vera</i>                  | 129300           | 48x             | 7545697   |         | 14560    | Illumina, Nanopore                            | wtdbg2 v2.0.0                                      | [220]      |
| <i>Artemisia annua</i>            | 1792.86          | 180x            | 39400     | 190477  | 20144    | 454, PacBio, Illumina                         | Newbler v. Oct-2014                                | [47]       |
| <i>Conyza canadensis</i>          | 426.383          | 248.0x          | 357       | 859     | 1620735  | PacBio, Illumina, Hi-C                        | CANU v. 1.8; Proximo v. 2.0                        | [221]      |
| <i>Erigeron breviscapus</i>       | 1,430            | 384x            | 1812      | 18973   | 140946   | Illumina, PacBio RSII, Hi-C                   | wtdbg                                              | [222]      |
| <i>Mikania micrantha</i>          | 1790.64          | 134.0x          | 2815      | 4414    | 1353263  | Illumina, PacBio                              | Canu v.1.6, FALCON v. 1.2.0, FALCON-Unzip v. 1.1.1 | [223]      |
| <i>Betula platyphylla</i>         | 430.49           | 122x            |           | 1550    | 751259   | Illumina, PacBio                              | pb-assemble (v0.0.2), wtdbg2 (v2.1)                | [224]      |
| <i>Corylus mandshurica</i>        | 367              | 309x            |           | 81      | 14849403 | Illumina, Nanopore                            | NextDenovo (v.2.1)                                 | [225]      |
| <i>Lithospermum erythrorhizon</i> | 367.41           | 94x             |           | 2465    | 314306   | Oxford Nanopore, Illumina                     | Abyss v2.1.5, DBG2OLC hybrid assembler             | [225]      |

|                                  |         |         |       |       |          |                                         |                                                                                               |       |
|----------------------------------|---------|---------|-------|-------|----------|-----------------------------------------|-----------------------------------------------------------------------------------------------|-------|
| <i>Erysimum cheiranthoides</i>   | 177.181 | 190x    | 223   | 931   | 1657946  | Illumina, PacBio                        | FALCON v. 2017-06-07                                                                          | [226] |
| <i>Isatis indigotica</i>         | 293.865 | 142.71x | 809   | 1198  | 1176212  | PacBio Sequel                           | Canu v. 1.6; wtdbg v. 1;<br>Quickmerge v. 0.2                                                 | [227] |
| <i>Chimonanthus praecox</i>      | 695.36  | 346.35x | 763   | 1623  | 2190841  | Illumina HiSeq, 10X<br>Genomics, PacBio | FALCON                                                                                        | [228] |
| <i>Chimonanthus salicifolius</i> | 853.434 | 532.0x  | 689   | 1788  | 2121821  | PacBio, Illumina, 10X<br>Genomics, Hi-C | FALCON v. 0.3; Pilon v.<br>1.16; FragScaff v. 140324.1;<br>LACHESIS v. 1                      | [63]  |
| <i>Cannabis sativa</i>           | 876.148 | 100x    | 221   | 1052  | 1959202  | PacBio, Nanopore,<br>Illumina           | minimap, miniasm2,<br>pilon, BWA                                                              |       |
| <i>Lonicera japonica</i>         | 843.2   | 100x    | 9     | 919   | 2148893  | Oxford Nanopore                         | CANU 1.8,<br>SMARTdenovo, pilon                                                               | [229] |
| <i>Casuarina equisetifolia</i>   | 301.458 | 546.93x | 2936  | 6546  | 466697   | Illumina HiSeq;<br>PacBio               | SOAP-denovo v. 2.04.4;<br>FALCON v. 1.8.2;<br>DISCOVAR v. 52488                               | [230] |
| <i>Tripterygium wilfordii</i>    | 348.533 | 793.34x | 321   | 467   | 4362171  | Illumina HiSeq,<br>PacBio               | FALCON v. 3.1                                                                                 | [3]   |
| <i>Kochia scoparia</i>           | 711.357 | 300.0x  | 19671 | 61599 | 20773    | Illumina, PacBio                        | MeCat v. April-2018                                                                           | [231] |
| <i>Cuscuta australis</i>         | 262.63  | 97.6x   | 103   | 218   | 3625894  | PacBio, Illumina<br>HiSeq               | Canu v. Oct-2016                                                                              | [232] |
| <i>Cuscuta campestris</i>        | 476.792 | 60x     | 6907  | 27832 | 48808    | PacBio, Illumina                        | DISCOVAR de novo<br>r52488, SSPACE-Standard<br>v3.0, SSPACE-Longread<br>v1.1, GapFiller v1.10 | [233] |
| <i>Cucurbita argyrosperma</i>    | 228.82  | 151x    | 920   | 1481  | 463388   | Illumina, PacBio                        | Platanus, DBG2OLC                                                                             | [234] |
| <i>Luffa cylindrica</i>          | 656.19  | 371x    | 332   | 480   | 8800239  | Illumina HiSeq,<br>PacBio               | FALCON, Quiver, BWA-<br>MEM, LACHESIS                                                         | [235] |
| <i>Momordica charantia</i>       | 302.992 | 84x     | 193   | 211   | 9902508  | PacBio Sequel,<br>HiSeq2500             | Canu v. 1.7; ALLMAPS                                                                          | [236] |
| <i>Sechium edule</i>             | 608.17  | 151x    | 103   | 473   | 8400000  | Illumina, Nanopore                      | Canu                                                                                          | [237] |
| <i>Siraitia grosvenorii</i>      | 469.5   | 180x    |       | 4128  | 432384   | PacBio, Illumina                        | FALCON, Pilon                                                                                 | [238] |
| <i>Trichosanthes anguina</i>     | 919.8   | 172.1x  | 69    | 202   | 20110000 | Nanopore, Illumina<br>HiSeq, Hi-C       | Canu, SMARTdenovo                                                                             | [239] |
| <i>Dioscorea dumetorum</i>       | 485.115 | 207x    |       | 924   | 3190870  | Illumina, Nanopore                      | Canu v1.8                                                                                     | [240] |

|                                |          |         |       |        |          |                                        |                                                                               |       |
|--------------------------------|----------|---------|-------|--------|----------|----------------------------------------|-------------------------------------------------------------------------------|-------|
| <i>Trichopus Zeylanicus</i>    | 713.407  | 83.0x   | 22601 | 25896  | 288821   | Illumina HiSeq,<br>PacBio Sequel       | MaSuRCA v. 3.2.3                                                              |       |
| <i>Diospyros lotus</i>         | 907      | 65X     |       | 3073   | 1060344  | Illumina, PacBio                       | Falcon                                                                        | [226] |
| <i>Rhododendron simsii</i>     | 528.637  | 270x    | 552   | 899    | 2274689  | Illumina, PacBio                       | SMARTDENOV0 v. 1.0                                                            | [241] |
| <i>Eucommia ulmoides</i>       | 1100     | 93x     | 29348 | 132188 | 15969    | Illumina, PacBio                       | Platanus assembler v1.2.1;<br>SSPACE v2.0; PBJelly2<br>v14.1.14; BWA v0.7.16a | [60]  |
| <i>Abrus precatorius</i>       | 347.23   | 140.0x  | 160   | 344    | 11837218 | Illumina, PacBio                       | FALCON v. 2018                                                                | [242] |
| <i>Arachis hypogaea</i>        | 2551.68  | 260x    | 29    | 32721  | 213557   | Illumina, PacBio,<br>Bionano           | DeNovoMAGIC2 v. 2                                                             | [243] |
| <i>Dalbergia odorifera</i>     | 638.26   | 637.83x | 384   |        | 5920000  | PacBio, Illumina<br>HiSeq, Hi-C        | Falcon v2.0.5, Quiver v5.0                                                    | [244] |
| <i>Pisum sativum</i>           | 3920     | 294x    | 24623 | 218010 | 37931    | Illumina, PacBio                       | Soapdenovo2, SSPACE<br>2.0                                                    | [245] |
| <i>Senna tora</i>              | 526.357  | 146.0x  | 444   | 738    | 3966958  | PacBio RSII; PacBio<br>Sequel          | FALCON-Unzip v. June-<br>2018                                                 | [56]  |
| <i>Spatholobus suberectus</i>  | 798.47   | 624x    | 816   | 1967   | 2052247  | PacBio Sequel,<br>Illumina             | FALCON v. 3.1                                                                 | [246] |
| <i>Castanea mollissima</i>     | 785.53   | 121x    |       | 2707   | 944461   | Illumina, PacBio                       | SMARTdenovo                                                                   | [247] |
| <i>Gelsemium elegans</i>       | 335.13   | 160x    | 545   | 738    | 10238528 | Oxford nanopore,<br>Illumina           | Canu v1.7.1, WTDBG<br>v1.2.8                                                  | [248] |
| <i>Hypericum perforatum</i>    | 373.65   | 653x    | 448   | 755    | 1409424  | Illumina, PacBio                       | FALCON assembler2                                                             | [57]  |
| <i>Callicarpa americana</i>    | 506.362  | 81x     | 328   | 965    | 7510543  | PacBio, Illumina<br>HiSeq, Hi-C        | Canu v1.7                                                                     | [249] |
| <i>Salvia bowleyana</i>        | 462.44   | 232x    | 238   | 1154   | 1180000  | Illumina, PacBio                       | MECAT, Canu                                                                   | [62]  |
| <i>Salvia splendens</i>        | 809.16   | 63x     | 1525  | 2051   | 2340816  | PacBio, Illumina                       | CANU v. 1.5                                                                   | [250] |
| <i>Scutellaria baicalensis</i> | 386.674  | 173.37x | 114   | 950    | 880642   | Illumina HiSeq X<br>Ten, PacBio Sequel | HI-C v. Mar-2018;<br>10XGenomics v. Mar-2018                                  | [53]  |
| <i>Scutellaria barbata</i>     | 353.0    | 130x    |       |        | 2500000  | PacBio, Oxford<br>Nanopore             | CANU (v1.7),<br>SMARTdenovo, Pilon<br>(v1.22)                                 | [17]  |
| <i>Cinnamomum kanehirae</i>    | 730.416  | 85.0x   | 2150  | 6084   | 498920   | PacBio                                 | FALCON v. 0.5.0                                                               | [251] |
| <i>Litsea cubeba</i>           | 1,325.68 | 150.0x  | 1,515 | 3,682  | 613688   | PacBio Sequel                          | FALCON v. 3.1                                                                 | [252] |

|                                |         |         |          |          |          |                                       |                                                                                                                                                                        |       |
|--------------------------------|---------|---------|----------|----------|----------|---------------------------------------|------------------------------------------------------------------------------------------------------------------------------------------------------------------------|-------|
| <i>Liriodendron chinense</i>   | 1742.42 | 87x     | 3710     | 4183     | 2204006  | Illumina, PacBio, Bionano             | FALCON v. 0.3.0                                                                                                                                                        | [253] |
| <i>Magnolia biondii</i>        | 2232    | 190x    | 9510     | 15615    | 269114   | Illumina, PacBio                      | Canu v. 0.136, Miniasm v. 0.337, Wtdbg v. 1.1.006, Flye v. 2.3.338, SMARTdenovo 1.0.0                                                                                  | [50]  |
| <i>Bombax ceiba</i>            | 895     | 350x    | 2759     | 3145     | 1023644  | Pacbio, Bionano                       | FALCON v0.3.0, PBJelly 2, Pilon                                                                                                                                        | [254] |
| <i>Paris polyphylla</i>        | 701800  | 98.59x  | 15306712 | 78957901 | 1814     | BGISEQ-500, 10X Genomics Chromium     | SOAPdenovo v. LR                                                                                                                                                       |       |
| <i>Toona sinensis</i>          | 596.35  | 333x    |          | 789      | 1525641  | Illumina HiSeq, Nanopore, Hi-C        | CANU v. 1.8, SMARTdenovo v1.0, Racon v1.3.3, Medaka v0.7.1, Pilon v1.23, bowtie2-2.3.5, HiC-Pro version 2.8.0_devel, Juicer v1.5, 3D de novo assembly (3D-DNA) v180922 | [255] |
| <i>Broussonetia papyrifera</i> | 386.83  | 311.73x | 345      | 3851     | 171170   | Illumina, Bionano                     | ALLPATHS-LG, SSPACE, BioNano Genomics,                                                                                                                                 | [256] |
| <i>Ficus carica</i>            | 333.44  | 74.0x   | 511      | 905      | 823517   | PacBio Sequel                         | FALCON-Unzip v. v0.5                                                                                                                                                   | [257] |
| <i>Ficus hispida</i>           | 369     | 250x    |          | 4194     | 492000   | Illumina, PacBio                      | CANU, SMARTdenovo                                                                                                                                                      | [258] |
| <i>Ficus microcarpa</i>        | 403 M   | 250x    |          | 5536     | 908000   | Illumina, PacBio                      | FALCON, SMARTdenovo                                                                                                                                                    | [258] |
| <i>Morus alba</i>              | 336.47  | 147.0x  | 249      | 519      | 3089666  | Oxford Nanopore, Illumina HiSeq, Hi-C | canu v. December-2018; smartdenovo v. December-2018; juicer v. December-2018; 3d-dna v. December-2018                                                                  | [259] |
| <i>Psidium guajava</i>         | 443.756 | 115.0x  | 44       | 73       | 15807569 | PacBio Sequel                         | FALCON v. 0.3                                                                                                                                                          | [170] |
| <i>Euryale ferox</i>           | 725.2   | 230x    |          | 451      | 4750000  | Illumina, Nanopore                    | Canu assembler                                                                                                                                                         | [260] |
| <i>Forsythia suspensa</i>      | 737.47  | 113.1x  |          | 1213     | 7333645  | Nanopore, ONT, Promethion             | WTDBG2 v. 2018-09-24                                                                                                                                                   | [261] |
| <i>Dendrobium huoshanense</i>  | 1285 Mb | 352x    |          |          | 598000   | Illumina HiSeq, PacBio                | Smart denovo                                                                                                                                                           | [262] |

|                                      |          |         |       |        |           |                                             |                                                             |       |
|--------------------------------------|----------|---------|-------|--------|-----------|---------------------------------------------|-------------------------------------------------------------|-------|
| <i>Averrhoa carambola</i>            | 320.43   | 546x    |       |        | 4219540   | Nanopore, Illumina HiSeq, Hi-C              | Canu v1.7                                                   | [263] |
| <i>Paeonia suffruticosa</i>          | 13793    | 67x     |       | 499810 | 499337    | PacBio                                      | Falcon v1.8.7                                               | [264] |
| <i>Papaver somniferum</i>            | 2715.53  | 239.0x  | 34381 | 65344  | 1773300   | Illumina HiSeq, PacBio, 10X Genomics        | DeNovoMAGIC v. 3.0; Falcon v. 3.1                           | [30]  |
| <i>Passiflora edulis</i>             | 1,332.18 | 222.43x |       |        | 3,100,000 | Oxford Nanopore, Illumina NovaSeq, Hi-C     | NextDenovo, Smartdenovo                                     | [265] |
| <i>Piper nigrum</i>                  | 761.22   | 275x    | 45    |        |           | BioNano, PacBio, Illumina                   | Canu, FALCON, BWA-MEM                                       | [48]  |
| <i>Antirrhinum majus</i>             | 520      | 174x    | 620   | 1645   | 733198    | Illumina, PacBio                            | CANU, SSPACE                                                | [266] |
| <i>Coix lacryma-jobi</i>             | 1731.46  | 238.6x  | 1233  | 8757   | 3121225   | Illumina HiSeq, PacBio RSII, PacBio Sequel  | HERA v. 2018                                                | [267] |
| <i>Setaria viridis</i>               | 397.03   | 130.0x  | 9     | 45     | 19521898  | Illumina, Nanopore                          | Hybrid assembly (miniasm, minimap2, racon) v. NOVEMBER-2019 | [268] |
| <i>Aegiceras corniculatum</i>        | 906.63   | 237x    |       |        | 7100000   | Illumina, PacBio                            | CANU v. version 2.0                                         | [269] |
| <i>Eriobotrya japonica</i>           | 760.10   | 131x    |       | 597    | 5020000   | Illumina, Nanopore                          | Canu v1.4, SMARTdenovo                                      | [270] |
| <i>Potentilla micrantha</i>          | 327      | 192x    | 2674  | 33026  | 16235     | Illumina, PacBio                            | ALLPATHs-LG, PBJelly                                        | [271] |
| <i>Prunus salicina</i>               | 284.209  | 255x    | 272   | 272    | 1777944   | Illumina, PacBio                            | FALCON v. 0.3.0                                             | [272] |
| <i>Rosa chinensis</i>                | 513.854  | 80.0x   | 55    | 88     | 22201688  | Illumina HiSeq, Hi-C                        | TIL-R v. Rev: 523; CANU v. 1.6                              | [273] |
| <i>Gardenia jasminoides</i>          | 535.679  | 60x     | 81    | 940    | 1028321   | Oxford Nanopore, Hi-C                       | Canu v. 1.8                                                 | [61]  |
| <i>Ophiorrhiza pumila</i>            | 440.319  | 308x    | 13    | 36     | 18486819  | PacBio RS II, PacBio Sequel, Illumina HiSeq | Canu v. 1.6                                                 | [7]   |
| <i>Poncirus trifoliata</i>           | 264.9    | 220x    | 152   | 809    | 842800    | Illumina, PacBio                            | Falcon v2018.03.12-04.00                                    | [274] |
| <i>Populus alba var. pyramidalis</i> | 464.516  | 350x    | 17797 | 55988  | 26535     | Illumina HiSeq, PacBio                      | Platanus, SSPACE-LongRead v1-1, PBJelly v15.8.24            | [275] |



|                                |         |        |       |       |          |                          |                                                                                  |       |
|--------------------------------|---------|--------|-------|-------|----------|--------------------------|----------------------------------------------------------------------------------|-------|
| <i>Acer truncatum</i>          | 633.28  | 531.6x | 34    | 1453  | 773169   | Illumina, PacBio, Hi-C   | Falcon, FALCON-Unzip, Quiver, Pilon, FragScaff                                   | [55]  |
| <i>Xanthoceras sorbifolium</i> | 505.79  | 375x   | 267   | 2002  | 645453   | Illumina, PacBio         | Falcon v. 0.7.0                                                                  | [276] |
| <i>Argania spinosa</i>         | 670.097 | 236x   | 75327 | 78992 | 43178    | Illumina, PacBio         | MaSuRCA v. 2018                                                                  | [277] |
| <i>Selaginella tamariscina</i> | 300.729 | 50x    | 1391  | 2143  | 228918   | PacBio                   | FALCON v. 0.3                                                                    | [278] |
| <i>Datura stramonium</i>       | 1288.64 | 30.85x | 30384 | 31084 | 56707    | Illumina, PacBio         | SparseAssembler v. Aug-2015, DBG2OLC v. Aug-2016, Canu v. 2.0, OPERA-LG v. 2.0.6 | [279] |
| <i>Solanum tuberosum</i>       | 716.17  | 70x    | 12    |       | 13367893 | Illumina, Nanopore       | Canu v. 1.8                                                                      | [280] |
| <i>Vitis amurens</i>           | 603.559 | 320x   | 3040  | 5873  | 344503   | Illumina, PacBio         | Platanus v. 1.2.4; DBG2OLC v. 2016-11-23                                         | [281] |
| <i>Coptis chinensis</i> Franch | 1.15 Gb | 100x   | 108   |       | 806,550  | Illumina, Nanopore, Hi-C | Canu (v1.6), SMARTdenovo (v1.5)                                                  | [2]   |

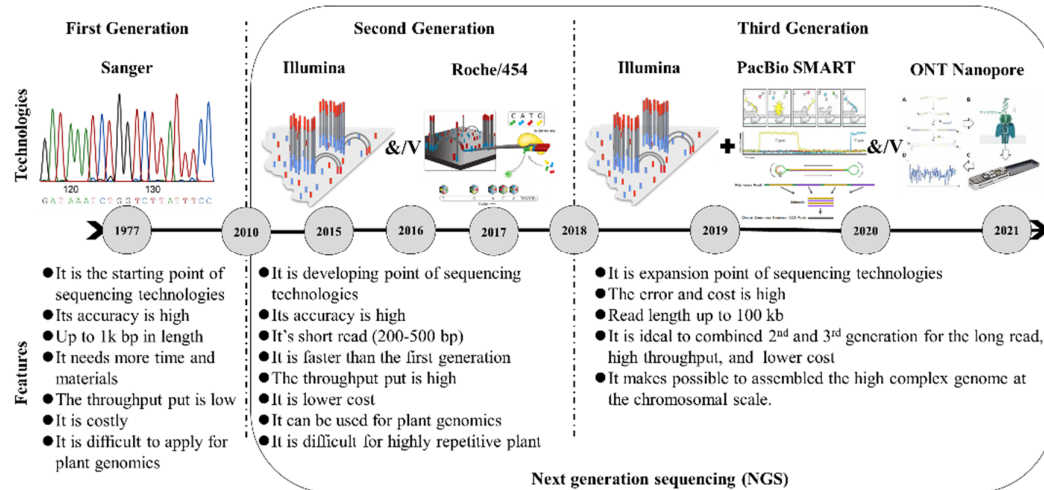

**Supplementary Figure S1.** The revolution of genome sequencing technologies.
